# Supplementary material for: Cost-utility analysis of the screening program for early oral cancer detection in Thailand
Source: PubMed Central journal article supplement (PMC6264816; doi:10.1371/journal.pone.0207442), 2018-11-29
Supplement: pone.0207442.s001.pdf [file pone.0207442.s001.pdf]

**S1 Table. Compliance rates of the oral precancer screening program in Thailand**

| <b>Screenings</b>                          | <b>Total number of eligible participants</b> | <b>Number of compliances</b> | <b>Compliance rate</b> |
|--------------------------------------------|----------------------------------------------|------------------------------|------------------------|
| Mouth self-examination                     | 9,750                                        | 9,482                        | 97%                    |
| Visual examination by trained dental nurse | 704                                          | 561                          | 80%                    |
| Visual examination by trained dentist      | 561                                          | 429                          | 76%                    |
| Visual examination by oral surgeon         | 22                                           | 20                           | 91%                    |
| Biopsy                                     | 13                                           | 8                            | 62%                    |
